# Supplementary material
Source: publisher figshare collection journal article supplement (https://acs.figshare.com/ndownloader/files/20139674)
Supplement: Supplementary file 1 [file 20139674]

# Cytotoxic 20,22-Dihydrodigitoxigenin Glycosides and Other Constituents of *Vallaris glabra* Stems

Sudarat Kruakaew, Chonticha Seeka, Jantana Yahuafai, Pongpun Siripong, and Somyote

Sutthivaiyakit

## Supporting Information

### Structural Identification of 7-10

Compound **7** was isolated as an amorphous solid with molecular formulas of  $C_{42}H_{68}O_{18}$  based on its HRESIMS data. The  $^1H$  and  $^{13}C$  NMR spectra of **7** exhibited resonances rather similar to those of **3**, except that **7** possesses an acofiopyranosyl unit instead of a vallasosyl group, together with recognizable resonances of two glucopyranosyl units in **7** (Table S1, Supporting Information), respectively. On the basis of previous study<sup>2</sup> and HMBC spectra of **7** showing cross-peaks between H-1'/C-3, H-1''/C-4' and H-1'''/C-6'', compound **7** was 20,22-dihydrodigitoxigenin-3-*O*- $\beta$ -D-glucopyranosyl-(1 $\rightarrow$ 6)- $\beta$ -D-glucopyranosyl-(1 $\rightarrow$ 4)- $\alpha$ -L-acofiopyranoside.

Compound **8** was isolated as an amorphous solid exhibiting a molecular formula of  $C_{44}H_{70}O_{19}$ . The  $^1H$  and  $^{13}C$  NMR spectra showed resonances similar to those of **7** (Table S1, Supporting Information), but with additional resonances of an acetyl group ( $\delta_H$  2.10, s) and a less-shielded H-2' resonance at  $\delta_H$  5.17 (dd,  $J$  = 3.2 and 1.8 Hz). Based on the 2-D NMR data, **8** was thus proposed as 20,22-dihydrodigitoxigenin-3-*O*- $\beta$ -D-glucopyranosyl-(1 $\rightarrow$ 6)- $\beta$ -D-glucopyranosyl-(1 $\rightarrow$ 4)- $\alpha$ -L-2'-*O*-acetylacofiopyranoside.

Compound **9** was obtained as an amorphous solid, its HRESIMS exhibited a  $[M+Na]^+$  ion at  $m/z$  897.4056 (calcd for  $C_{42}H_{66}O_{19}Na$ , 897.4077). The  $^1H$  and  $^{13}C$  NMR spectra showed rather complex sets of resonances, although the characteristic resonances of a gitoxigenin and vallasosyl groups could be recognized (Table S2, Supporting Information). Additional resonances, particularly of the two anomeric [ $\delta_H$  4.39 (d,  $J$  = 7.8 Hz, H-1'', and  $\delta_C$  102.5, C-1'') and  $\delta_H$  4.39 (d,  $J$  = 7.8 Hz, H-1''', and  $\delta_C$  105.0, C-1''')] and two oxymethylene groups [ $\delta_H$  4.14 (dd,  $J$  = 11.8 and 1.9 Hz),  $\delta_C$  70.2, C-6'', and  $\delta_H$  3.86 (dd,  $J$  = 11.5 and 1.8 Hz), and 3.66 (dd,  $J$  = 11.5 and 5.3 Hz) and  $\delta_C$  62.8, C-6'''], indicated the presence of two glucosyl groups in **9**. The connectivities of C-3-*O* to C-1', C-4'-*O* to C-1'' and C-6''-*O* to C-1''' were based on the HMBC cross-peaks between H-1'/C-3; H-1''/C-4', and H-1'''/C-6'', respectively. On the basis of previous report which provided L-vallarose, L-acofriose and D-glucose after acid hydrolyses of oleandrigenin-3-*O*- $\alpha$ -L-2'-*O*-acetylvallopyranoside and oleandrigenin-3-*O*- $\beta$ -D-glucopyranosyl-(1 $\rightarrow$ 4)- $\alpha$ -L-2'-*O*-acetylacofiopyranoside,<sup>2</sup> **9** was thus proposed as gitoxigenin-3-*O*- $\beta$ -D-glucopyranosyl-(1 $\rightarrow$ 6)- $\beta$ -D-glucopyranosyl-(1 $\rightarrow$ 4)- $\alpha$ -L-vallaropyranoside.

Compound **10** was isolated as an amorphous colorless solid with same molecular mass as of **9**. The  $^1H$  and  $^{13}C$  NMR spectra exhibited resonances similar to those of **9** (Table S2, Supporting Information), although the resonances for a vallasosyl moiety were replaced by those of an

acofriosyl group, showing an indicative resonance for H-5' at somewhat higher-field than that of a vellarosyl group in **9**. Based on its spectroscopic data and a previous study, **10** was therefore concluded to be gitoxygenin-3-*O*- $\beta$ -D-glucopyranosyl-(1 $\rightarrow$ 6)- $\beta$ -D-glucopyranosyl-(1 $\rightarrow$ 4)- $\alpha$ -L-acofriopyranoside.

## Isolation of Compounds 7-16

### EXPERIMENTAL SECTION

**General Experimental Procedures.** Melting points were measured using an Electrothermal melting point apparatus and are uncorrected. Optical rotations were recorded on a JASCO DIP 1020 polarimeter. The IR spectra were obtained on a Perkin-Elmer 1760x FT-IR spectrophotometer. The  $^1\text{H}$  and  $^{13}\text{C}$  NMR spectra were recorded with a Bruker AVANCE III HD 400 MHz NMR spectrometer. Chemical shifts are referenced to the residual solvent signals (MeOH-*d*<sub>4</sub>:  $\delta_{\text{H}}$  3.30 and  $\delta_{\text{C}}$  49.0 ppm). HRESIMS were recorded on a Bruker Daltonics microTOF mass spectrometer.

**Plant Material.** The plant investigated, *Vallaris glabra*, was obtained as previously reported. A voucher specimen (SSVG-1/2012) is maintained at the Department of Chemistry, Ramkhamhaeng University.<sup>2</sup>

**Extraction and Isolation.** Dried *V. glabra* stems (4.5 kg) were ground and extracted successively with hexanes (8 L),  $\text{CH}_2\text{Cl}_2$  (8 L) and MeOH (8 L), respectively, using a Soxhlet extractor. The resultant hexanes (70.0 g),  $\text{CH}_2\text{Cl}_2$  (59.9 g) and MeOH (95.2 g) extracts were obtained after removal of solvent.

The  $\text{CH}_2\text{Cl}_2$  extract (59.9 g) was fractionated by column chromatography (CC, silica gel, hexanes-  $\text{CH}_2\text{Cl}_2$  65:35 to  $\text{CH}_2\text{Cl}_2$ -MeOH 85:15) to obtain ten fractions. Fraction 3 (3.65 g) was fractionated by CC (Sephadex LH-20, MeOH) to give four subfractions (3.1-3.4). Subfraction 3.3 (1.37 g) was fractionated (CC, silica gel, hexanes-EtOAc 70:30) to give seven subfractions (3.3.1-3.3.7). Subfraction 3.3.1 provided ursolic acid (30.8 mg) and subfraction 3.3.2 provided 3,27-dihydroxyursolic acid (19.1 mg) after recrystallization from  $\text{CH}_2\text{Cl}_2$ /MeOH. Subfraction 3.3.3 (134.0 mg) was purified using CC (silica gel, hexanes-EtOAc 70:30) to give three subfractions (3.3.3.1-3.3.3.3), and subfraction 3.3.3.2 (42.4 mg) was further purified by CC (silica gel,  $\text{CH}_2\text{Cl}_2$ -MeOH 99:1) to afford **15** (8.3 mg), **11** (4.2 mg) and **13** (13.8 mg). Subfraction 3.3.5 (190.3 mg) was subjected to CC (silica gel, hexanes-EtOAc 70:30) to give **16** (22.0 mg). Fraction 4 (1.65 g), after fractionation (CC, Sephadex LH-20, MeOH), provided three subfractions (4.1-4.3). Subfraction 4.2 (703.6 mg) was further fractionated (Sephadex LH-20, MeOH, then CC, silica gel,  $\text{CH}_2\text{Cl}_2$ -MeOH 98:2) to give additional amount of **11** (10.9 mg) and **13** (3.8 mg), and also **14** (39.5 mg) and **12** (31.7 mg).

The MeOH extract (95.2 g) was fractionated by CC (Dianion HP-20, MeOH-H<sub>2</sub>O, 0:100 to 100:0) to obtain five fractions. The water-soluble fractions 1-3, containing mostly sugars, were not investigated further. The less polar fraction 5 (6.35 g) was fractionated by reversed-phase CC (RP-18, MeOH-H<sub>2</sub>O 30:70 to 100:0) to obtain six subfractions (5.1-5.6). Subfraction 5.2 (820.3 mg) was purified by CC (silica gel,  $\text{CH}_2\text{Cl}_2$ -MeOH, 88:12 to 85:15) and provided three subfractions (5.2.1- 5.2.3). Subfraction 5.2.2 (79.2 mg) after reversed-phase CC (RP-18, MeOH-H<sub>2</sub>O 40:60 to 100:0) furnished oleandrigenin-3-*O*- $\beta$ -D-glucopyranosyl-(1 $\rightarrow$ 6)- $\beta$ -D-glucopyranosyl-(1 $\rightarrow$ 4)- $\alpha$ -L-2'-*O*-acetylacofriopyranoside (48.3 mg) and **8** (4.2 mg). Subfraction 5.4 (1.29 g) was fractionated by CC (RP-18, MeOH-H<sub>2</sub>O 10:90 to 100:0) to give eight

subfractions (5.4.1-5.4.8). Oleandrigenin-3-*O*- $\beta$ -D-glucopyranosyl-(1 $\rightarrow$ 6)- $\beta$ -D-glucopyranosyl-(1 $\rightarrow$ 4)- $\alpha$ -L-vallaropyranoside<sup>2</sup> (38.1 mg) was obtained from subfraction 5.4.3.4. Subfraction 5.4.5 (147.1 mg) was CC (silica gel, CH<sub>2</sub>Cl<sub>2</sub>-MeOH 88:12 to 86:14, then RP-18, MeOH-H<sub>2</sub>O 45:55 to 100:0) to give oleandrigenin-3-*O*- $\beta$ -D-glucopyranosyl-(1 $\rightarrow$ 4)- $\alpha$ -L-*O*-acofriopyranoside (11.2 mg) and oleandrigenin-3-*O*- $\beta$ -D-glucopyranosyl-(1 $\rightarrow$ 4)- $\alpha$ -L-*O*-vallaropyranoside (2.3 mg). Subfraction 5.4.6 (243.5 mg) was purified by CC (silica gel, CH<sub>2</sub>Cl<sub>2</sub>-MeOH 88:12 to 86:14) to give five subfractions (5.4.6.1-5.4.6.5). Subfraction 5.4.6.5 (33.9 mg) after further purification (CC, RP-18, MeOH-H<sub>2</sub>O 40:60 to 100:0) provided **7** (4.7 mg). Subfraction 5.4.8 (270.5 mg) was subjected to CC (silica gel, CH<sub>2</sub>Cl<sub>2</sub>-MeOH 85:15 to 80:20) to give four subfractions (5.4.8.1-5.4.8.4). Subfraction 5.4.8.1 (12.6 mg) afforded **3** (2.9 mg) and **4** (1.7 mg) after CC (RP-18, MeOH-H<sub>2</sub>O 50:50 to 100:0). Subfraction 5.4.8.3 (29.0 mg) was further purified by CC (RP-18, MeOH-H<sub>2</sub>O 55:50 to 100:0) to give additional quantity of **8** (6.3 mg). The polar fraction 4 (2.25 g) was fractionated using CC (silica gel, CH<sub>2</sub>Cl<sub>2</sub>-MeOH 88:12 to 84:16) to obtain eleven subfractions (4.1-4.11). Selection of compounds based on TLC identity led to **9** (5.3 mg) and **10** (4.0 mg) being obtained from subfraction 4.11 (45.2 mg) after reversed-phase CC (RP-18, MeOH-H<sub>2</sub>O 40:60 to 100:0).

*20,22-Dihydrodigitoxigenin-3-O- $\beta$ -D-glucopyranosyl-(1 $\rightarrow$ 6)- $\beta$ -D-glucopyranosyl-(1 $\rightarrow$ 4)- $\alpha$ -L-acofriopyranoside (**7**):*  $[\alpha]_D^{25}$  -42.3 (c 0.23, MeOH); FT-IR (ATR)  $\nu_{\max}$  3366, 2922, 2873, 2855, 1746, 1450, 1379, 1234, 1199, 1105, 1068, 1045, 1016, 986 cm<sup>-1</sup>; <sup>1</sup>H NMR (MeOH-*d*<sub>4</sub>, 400 MHz) and <sup>13</sup>C NMR (MeOH-*d*<sub>4</sub>, 100 MHz) data see Table S1, Supporting Information; HRESIMS *m/z* 883.4315 [M + Na]<sup>+</sup> (calcd for C<sub>42</sub>H<sub>68</sub>NaO<sub>18</sub>, 883.4284).

*20,22-Dihydrodigitoxigenin-3-O- $\beta$ -D-glucopyranosyl-(1 $\rightarrow$ 6)- $\beta$ -D-glucopyranosyl-(1 $\rightarrow$ 4)- $\alpha$ -L-2'-*O*-acetylacofriopyranoside (**8**):*  $[\alpha]_D^{25}$  -40.7 (c 0.34, MeOH); FT-IR (ATR)  $\nu_{\max}$  3369, 2928, 2884, 2865, 1732, 1723, 1447, 1376, 1236, 1214, 1122, 1094, 1067, 1038, 1019, 987 cm<sup>-1</sup>; <sup>1</sup>H NMR (MeOH-*d*<sub>4</sub>, 400 MHz) and <sup>13</sup>C NMR (MeOH-*d*<sub>4</sub>, 100 MHz) data see Table S1, Supporting Information; HRESIMS *m/z* 925.4407 [M + Na]<sup>+</sup> (calcd for C<sub>44</sub>H<sub>70</sub>NaO<sub>19</sub>, 925.4389).

*Gitoxigenin-3-O- $\beta$ -D-glucopyranosyl-(1 $\rightarrow$ 6)- $\beta$ -D-glucopyranosyl-(1 $\rightarrow$ 4)- $\alpha$ -L-vallaropyranoside (**9**):*  $[\alpha]_D^{25}$  -35.9 (c 0.26, MeOH); FT-IR (ATR)  $\nu_{\max}$  3333, 2922, 2882, 2858, 1732, 1627, 1603, 1453, 1349, 1269, 1165, 1068, 1027, 1014 cm<sup>-1</sup>; <sup>1</sup>H NMR (MeOH-*d*<sub>4</sub>, 400 MHz) and <sup>13</sup>C NMR (MeOH-*d*<sub>4</sub>, 100 MHz) data see Table S2, Supporting Information; HRESIMS *m/z* 897.4056 [M + Na]<sup>+</sup> (calcd for C<sub>42</sub>H<sub>66</sub>NaO<sub>19</sub>, 897.4077).

*Gitoxigenin-3-O- $\beta$ -D-glucopyranosyl-(1 $\rightarrow$ 6)- $\beta$ -D-glucopyranosyl-(1 $\rightarrow$ 4)- $\alpha$ -L-acofriopyranoside (**10**):*  $[\alpha]_D^{25}$  -26.4 (c 0.22, MeOH); FT-IR (ATR)  $\nu_{\max}$  3359, 2922, 2854, 1730, 1627, 1449, 1377, 1288, 1243, 1164, 1103, 1068, 1023, 987 cm<sup>-1</sup>; <sup>1</sup>H NMR (MeOH-*d*<sub>4</sub>, 400 MHz) and <sup>13</sup>C NMR (MeOH-*d*<sub>4</sub>, 100 MHz) data see Table S2, Supporting Information; HRESIMS *m/z* 897.4062 [M + Na]<sup>+</sup> (calcd for C<sub>42</sub>H<sub>66</sub>NaO<sub>19</sub>, 897.4077).

**Table S1.**  $^1\text{H}$  (400 MHz) and  $^{13}\text{C}$  (100 MHz) NMR Spectroscopic Data of **7** and **8** (in  $\text{MeOH-}d_4$ )

| position       | <b>7</b>                                     |                            | <b>8</b>                                    |                            |
|----------------|----------------------------------------------|----------------------------|---------------------------------------------|----------------------------|
|                | $\delta_{\text{H}}$ (J in Hz)                | $\delta_{\text{C}}$ , type | $\delta_{\text{H}}$ (J in Hz)               | $\delta_{\text{C}}$ , type |
| 1              | 1.74, 1.38                                   | 30.9, $\text{CH}_2$        | 1.83, 1.55                                  | 31.0, $\text{CH}_2$        |
| 2              | 1.78, 1.15                                   | 27.9, $\text{CH}_2$        | 1.90, 1.25                                  | 27.4, $\text{CH}_2$        |
| 3              | 3.83 brs ( $W_{1/2} = 7.5$ Hz)               | 74.0, CH                   | 3.93 ( $W_{1/2} = 8.0$ Hz)                  | 74.7, CH                   |
| 4              | 1.42, 1.30                                   | 31.6, $\text{CH}_2$        | 1.39                                        | 31.6, $\text{CH}_2$        |
| 5              | 1.51                                         | 38.2, CH                   | 1.65                                        | 38.2, CH                   |
| 6              | 1.48                                         | 27.4, $\text{CH}_2$        | 1.58                                        | 27.8, $\text{CH}_2$        |
| 7              | 1.66                                         | 22.4, $\text{CH}_2$        | 1.77                                        | 22.4, $\text{CH}_2$        |
| 8              | 1.56                                         | 42.3, CH                   | 1.64                                        | 42.4, CH                   |
| 9              | 1.60                                         | 36.8, CH                   | 1.64                                        | 36.4, CH                   |
| 10             | -                                            | 36.5, C                    | -                                           | 36.4, C                    |
| 11             | 1.28, 1.15                                   | 22.1, $\text{CH}_2$        | 1.25, 1.35                                  | 22.1, $\text{CH}_2$        |
| 12             | 1.33, 1.25                                   | 42.0, $\text{CH}_2$        | 1.33, 1.42                                  | 42.0, $\text{CH}_2$        |
| 13             | -                                            | 48.5, C                    | -                                           | 48.3, C                    |
| 14             | -                                            | 86.8, C                    | -                                           | 86.8, C                    |
| 15             | 1.88, 1.45                                   | 32.4, $\text{CH}_2$        | 1.98, 1.56                                  | 32.4, $\text{CH}_2$        |
| 16             | 1.83, 1.43                                   | 25.3, $\text{CH}_2$        | 1.93, 1.51                                  | 26.2, $\text{CH}_2$        |
| 17             | 1.62                                         | 55.3, CH                   | 1.73                                        | 55.3, CH                   |
| 18             | 0.88 s                                       | 16.9, $\text{CH}_3$        | 0.94 s                                      | 16.9, $\text{CH}_3$        |
| 19             | 0.87 s                                       | 24.4, $\text{CH}_3$        | 0.96 s                                      | 24.4, $\text{CH}_3$        |
| 20             | 2.77 quint-like (8.7)                        | 40.4, CH                   | 2.86 quint-like (8.8)                       | 40.3, CH                   |
| 21             | 4.33 t (8.7), 4.00 t (9.1) <sup>a</sup>      | 73.9, $\text{CH}_2$        | 4.41 t (8.8), 4.08 t (9.1)                  | 73.9, $\text{CH}_2$        |
| 22             | 2.57 dd (17.6, 8.5),<br>2.15 dd (17.6, 10.0) | 36.5, $\text{CH}_2$        | 2.65 dd (17.6, 9.9),<br>2.23 dd (17.6, 8.5) | 36.5, $\text{CH}_2$        |
| 23             | -                                            | 180.8, C                   | -                                           | 180.7, C                   |
| 1'             | 4.71 d (2.0)                                 | 99.8, CH                   | 4.79 d (1.8)                                | 97.3, CH                   |
| 2'             | 3.87 dd (2.0, 3.1)                           | 68.5, CH                   | 5.17 dd (3.2, 1.8)                          | 70.2, CH                   |
| 3'             | 3.50 dd (3.1, 8.9)                           | 82.6, CH                   | 3.72 dd (9.4, 3.2) <sup>d</sup>             | 81.0, CH                   |
| 4'             | 3.64 t (8.9) <sup>b</sup>                    | 79.0, CH                   | 3.62 t (9.4)                                | 79.4, CH                   |
| 5'             | 3.62 dq (8.9, 5.8) <sup>b</sup>              | 68.7, CH                   | 3.75 dq (6.3, 9.4) <sup>d</sup>             | 68.8, CH                   |
| 6'             | 1.18 d (5.4)                                 | 18.3, $\text{CH}_3$        | 1.29 d (6.3)                                | 18.3, $\text{CH}_3$        |
| $\text{OCH}_3$ | 3.34 s                                       | 56.3, $\text{CH}_3$        | 3.39 s                                      | 57.7, $\text{CH}_3$        |
| 1''            | 4.51 d (7.8)                                 | 104.9, CH                  | 4.58 d (7.8)                                | 104.9, CH                  |
| 2''            | 3.11 t (8.4)                                 | 75.2, CH                   | 3.14 t (8.6)                                | 75.6, CH                   |
| 3''            | 3.25                                         | 77.9, CH                   | 3.36 t (8.9) <sup>e</sup>                   | 77.7, CH                   |
| 4''            | 3.24                                         | 71.6, CH                   | 3.34 t (9.2) <sup>e</sup>                   | 71.8, CH                   |
| 5''            | 3.29 <sup>c</sup>                            | 77.0, CH                   | 3.42 ddd (5.7, 3.5, 1.9)                    | 76.9, CH                   |

|                        |                                                      |                       |                                                          |                                   |
|------------------------|------------------------------------------------------|-----------------------|----------------------------------------------------------|-----------------------------------|
| 6''                    | 4.04 dd (11.8, 1.8) <sup>a</sup> , 3.67 <sup>b</sup> | 70.5, CH <sub>2</sub> | 4.13 dd (11.7, 1.9),<br>3.78 dd (11.7, 5.7) <sup>d</sup> | 70.5, CH <sub>2</sub>             |
| 1'''                   | 4.28 d (7.8)                                         | 105.0, CH             | 4.37 d (7.8)                                             | 105.0, CH                         |
| 2'''                   | 3.08 t (8.1)                                         | 75.7, CH              | 3.21 dd (8.9, 7.8)                                       | 75.2, CH                          |
| 3'''                   | 3.25 <sup>c</sup>                                    | 77.8, CH              | 3.36 t (8.9) <sup>e</sup>                                | 78.0, CH                          |
| 4'''                   | 3.24 t (6.9)                                         | 71.8, CH              | 3.27 t <sup>f</sup>                                      | 71.6, CH                          |
| 5'''                   | 3.17                                                 | 77.9, CH              | 3.26 <sup>f</sup>                                        | 78.0, CH                          |
| 6'''                   | 3.77 d (11.1),<br>3.58 dd (5.0, 11.7)                | 62.7, CH <sub>2</sub> | 3.86 dd (12.1, 1.7),<br>3.66 dd (11.9, 5.1)              | 62.8, CH <sub>2</sub>             |
| OCOCH <sub>3</sub> -2' |                                                      |                       | 2.10 s                                                   | 20.9, CH <sub>3</sub><br>172.2, C |

<sup>a-f</sup>Overlapped signals.

---

**Table S2.**  $^1\text{H}$  (400 MHz) and  $^{13}\text{C}$  (100 MHz) NMR Spectroscopic Data of **9** and **10** (in MeOH- $d_4$ )

| position         | <b>9</b>                                    |                            | <b>10</b>                                   |                            |
|------------------|---------------------------------------------|----------------------------|---------------------------------------------|----------------------------|
|                  | $\delta_{\text{H}}$ ( $J$ in Hz)            | $\delta_{\text{C}}$ , type | $\delta_{\text{H}}$ ( $J$ in Hz)            | $\delta_{\text{C}}$ , type |
| 1                | 1.87, 1.47                                  | 31.5, CH <sub>2</sub>      | 1.87, 1.47                                  | 31.6, CH <sub>2</sub>      |
| 2                | 1.60                                        | 27.9, CH <sub>2</sub>      | 1.60                                        | 27.4, CH <sub>2</sub>      |
| 3                | 3.92 ( $W_{1/2} = 8.0$ Hz) <sup>a</sup>     | 74.8, CH                   | 3.94 ( $W_{1/2} = 9.0$ Hz)                  | 74.1, CH                   |
| 4                | 1.84, 1.52                                  | 31.5, CH <sub>2</sub>      | 1.52, 1.40                                  | 31.0, CH <sub>2</sub>      |
| 5                | 1.77                                        | 38.1, CH                   | 1.64                                        | 38.2, CH                   |
| 6                | 1.98, 1.26                                  | 27.6, CH <sub>2</sub>      | 1.90                                        | 27.8, CH <sub>2</sub>      |
| 7                | 1.43                                        | 22.5, CH <sub>2</sub>      | 1.43, 1.24                                  | 22.1, CH <sub>2</sub>      |
| 8                | 1.58                                        | 42.9, CH                   | 1.60                                        | 42.9, CH                   |
| 9                | 1.66                                        | 36.8, CH                   | 1.66                                        | 36.8, CH                   |
| 10               | -                                           | 36.3, C                    | -                                           | 36.3, C                    |
| 11               | 1.80, 1.24                                  | 22.1, CH <sub>2</sub>      | 1.83                                        | 22.4, CH <sub>2</sub>      |
| 12               | 1.56, 1.40                                  | 41.0, CH <sub>2</sub>      | 1.55, 1.39                                  | 41.0, CH <sub>2</sub>      |
| 13               | -                                           | 51.3, C                    | -                                           | 51.3, C                    |
| 14               | -                                           | 85.7, C                    | -                                           | 85.6, C                    |
| 15               | 2.61 dd (8.4, 14.8),<br>1.70 dd (2.3, 14.8) | 43.8, CH <sub>2</sub>      | 2.62 dd (8.5, 15.0),<br>1.70 dd (2.2, 15.0) | 43.8, CH <sub>2</sub>      |
| 16               | 4.64 dd (8.0, 2.0) <sup>b</sup>             | 73.2, CH                   | 4.64 dt (7.9, 2.3) <sup>e</sup>             | 73.1, CH                   |
| 17               | 3.12 d (7.8)                                | 57.9, CH                   | 3.12 d (7.9)                                | 59.7, CH                   |
| 18               | 0.91 s                                      | 17.1, CH <sub>3</sub>      | 0.91 s                                      | 17.1, CH <sub>3</sub>      |
| 19               | 0.94 s                                      | 24.4, CH <sub>3</sub>      | 0.95 s                                      | 24.4, CH <sub>3</sub>      |
| 20               | -                                           | 173.6, C                   | -                                           | 173.6, C                   |
| 21               | 5.16 dd (1.6, 16.8),<br>5.09 dd (1.6, 16.9) | 77.9, CH <sub>2</sub>      | 5.16 dd (18.4, 1.7),<br>5.09 dd (18.5, 1.6) | 77.9, CH <sub>2</sub>      |
| 22               | 5.93 t (1.6)                                | 120.6, CH <sub>2</sub>     | 5.93 t (1.6)                                | 120.6, CH <sub>2</sub>     |
| 23               | -                                           | 177.3, C                   | -                                           | 177.3, C                   |
| 1'               | 4.66 d (2.9) <sup>b</sup>                   | 100.3, CH                  | 4.80 d (1.7)                                | 99.8, CH                   |
| 2'               | 3.93 dd (5.4, 3.4) <sup>a</sup>             | 69.3, CH                   | 3.97 dd (3.1, 1.9)                          | 68.6, CH                   |
| 3'               | 3.63 dd (5.2, 3.3)                          | 79.0, CH                   | 3.59 dd (8.9, 3.2)                          | 82.7, CH                   |
| 4'               | 3.95 dd (7.6, 3.2)                          | 76.8, CH                   | 3.72 <sup>f</sup>                           | 79.1, CH                   |
| 5'               | 4.20 quintet (7.1)                          | 67.2, CH                   | 3.71 <sup>f</sup>                           | 68.8, CH                   |
| 6'               | 1.24 d (6.6)                                | 17.9, CH <sub>3</sub>      | 1.27 d (5.3)                                | 18.3, CH <sub>3</sub>      |
| OCH <sub>3</sub> | 3.48 s                                      | 59.7, CH <sub>3</sub>      | 3.43 s                                      | 59.9, CH <sub>3</sub>      |
| 1''              | 4.39 d (7.8) <sup>c</sup>                   | 102.5, CH                  | 4.60 d (7.8) <sup>e</sup>                   | 104.9, CH                  |
| 2''              | 3.21 t (7.9)                                | 75.2, CH                   | 3.16 t (8.6)                                | 75.8, CH                   |

|      |                                             |                       |                                                          |                       |
|------|---------------------------------------------|-----------------------|----------------------------------------------------------|-----------------------|
| 3''  | 3.36 t (8.8) <sup>d</sup>                   | 77.7, CH              | 3.34 t (8.6)                                             | 77.9, CH              |
| 4''  | 3.31 <sup>d</sup>                           | 71.7, CH              | 3.33 t (9.5)                                             | 71.9, CH              |
| 5''  | 3.45 ddd (8.4, 6.3, 2.0)                    | 77.3, CH              | 3.40 ddd (9.8, 4.9, 2.6)                                 | 77.0, CH              |
| 6''  | 4.14 dd (11.8, 1.9)                         | 70.2, CH <sub>2</sub> | 4.13 dd (11.6, 1.9),<br>3.75 dd (11.7, 6.0) <sup>f</sup> | 70.5, CH <sub>2</sub> |
| 1''' | 4.39 d (7.8) <sup>c</sup>                   | 105.0, CH             | 4.37 d (7.8)                                             | 105.0, CH             |
| 2''' | 3.19 t (7.9)                                | 75.3, CH              | 3.19 t (7.8)                                             | 75.2, CH              |
| 3''' | 3.36 <sup>d</sup>                           | 77.8, CH              | 3.34 t (7.7)                                             | 77.9, CH              |
| 4''' | 3.28                                        | 71.7, CH              | 3.28 <sup>g</sup>                                        | 71.6, CH              |
| 5''' | 3.26                                        | 78.0, CH              | 3.26 <sup>g</sup>                                        | 78.0, CH              |
| 6''' | 3.86 dd (11.5, 1.8),<br>3.66 dd (11.5, 5.3) | 62.8, CH <sub>2</sub> | 3.85 dd (11.9, 1.8),<br>3.66 dd (11.9, 5.3)              | 62.8, CH <sub>2</sub> |

<sup>a-g</sup>Overlapped signals.

**Table S3.** Cytotoxic Activity of Compounds **11-16**<sup>a</sup>

| compound                 | HT-29       | A 549     | HeLa        | Vero      |
|--------------------------|-------------|-----------|-------------|-----------|
| <b>11</b>                | >10         | 2.3 ± 0.1 | 6.1 ± 0.8   | >10       |
| <b>12</b>                | >10         | 2.2 ± 0.3 | 8.0 ± 1.6   | >10       |
| <b>13</b>                | 0.6 ± 0.1   | >10       | >10         | >10       |
| <b>14</b>                | >10         | 6.5 ± 0.8 | 7.2 ± 0.5   | >10       |
| <b>15</b>                | >10         | >10       | >10         | >10       |
| <b>16</b>                | >10         | 6.8 ± 0.1 | 9.8 ± 0.01  | >10       |
| doxorubicin <sup>b</sup> | 0.44 ± 0.15 | 1.0 ± 0.1 | 0.12 ± 0.05 | 3.5 ± 0.7 |

<sup>a</sup> Values indicated are IC<sub>50</sub> values in μM, data are means ± SD of three independent experiments, each performed in six replicates. <sup>b</sup>Positive control
